# Supplementary material
Source: Springer Nature journal article supplement (https://www.springermedizin.de/resource/supplementary/12876_2014_1205_MOESM1_ESM.pdf/9438340)
Supplement: MOESM1 [file 9438340]

**Additional file 1: Table S1**

Reference ranges for blood tests - used in the study - at various ages.

| <b>HEMOGLOBIN in g/dl</b>                         |                        |
|---------------------------------------------------|------------------------|
| <b>Age</b>                                        | <b>Reference range</b> |
| 2 months - 3 months                               | 9.2 - 15.0             |
| 3 months - 4 months                               | 9.7 - 12.7             |
| 4 months - 6 months                               | 10.1 - 12.9            |
| 6 months - 1 year                                 | 10.5 - 12.9            |
| 1 year - 2 years                                  | 10.8 - 12.7            |
| 2 years - 3 years                                 | 10.8 - 12.7            |
| 3 years - 10 years                                | 11.1 - 14.3            |
| 10 years - 12 years                               | 11.9 - 14.7            |
| 12 years - 16 years                               | 12.7 - 16.7            |
| >18 years (male)                                  | 13.8 - 19.5            |
| >18 years (female)                                | 11.9 - 17.2            |
| <b>ERYTHROCYTES in Tpt/l</b>                      |                        |
| <b>Age</b>                                        | <b>Reference range</b> |
| 2 months - 3 months                               | 2.80 - 4.80            |
| 3 months - 4 months                               | 3.10 - 4.70            |
| 4 months - 6 months                               | 3.20 - 5.20            |
| 6 months - 1 year                                 | 3.60 - 5.20            |
| 1 year - 3 years                                  | 3.70 - 5.30            |
| 3 years - 10 years                                | 3.70 - 5.70            |
| 10 years - 12 years                               | 3.80 - 5.80            |
| 12 years - 16 years                               | 4.30 - 5.90            |
| > 16 years (male)                                 | 4.60 - 6.20            |
| > 16 years (female)                               | 4.20 - 5.40            |
| <b>MEAN CORPUSCULAR VOLUME in femtoliter (fL)</b> |                        |
| <b>Age</b>                                        | <b>Reference range</b> |
| 2 months - 3 months                               | 81 - 121               |
| 3 months - 4 months                               | 77 - 113               |
| 4 months - 6 months                               | 73 - 109               |
| 6 months - 1 year                                 | 74 - 102               |
| 1 year - 3 years                                  | 73 - 101               |
| 3 years - 10 years                                | 72 - 88                |
| 10 years - 12 years                               | 69 - 93                |
| 12 years - 16 years                               | 72 - 90                |
| > 16 years                                        | 80 - 96                |

| <b>HEMATOCRIT</b>                                       |                        |
|---------------------------------------------------------|------------------------|
| <b>Age</b>                                              | <b>Reference range</b> |
| 2 months - 3 months                                     | 0.300- 0.440           |
| 3 months - 4 months                                     | 0.310 - 0.430          |
| 4 months - 6 months                                     | 0.320 - 0.440          |
| 6 months - 1 year                                       | 0.350 - 0.430          |
| 1 year - 2 years                                        | 0.350 - 0.430          |
| 2 years - 3 years                                       | 0.350 - 0.430          |
| 3 years - 10 years                                      | 0.310 - 0.430          |
| 10 years - 12 years                                     | 0.330 - 0.450          |
| 12 years - 16 years                                     | 0.360 - 0.480          |
| > 16 years (male)                                       | 0.400 - 0.540          |
| > 16 years (female)                                     | 0.370 - 0.470          |
| <b>SERUM FERRITIN LEVEL in µg/L</b>                     |                        |
| <b>Age</b>                                              | <b>Reference range</b> |
| <= 1 month                                              | 150.0 - 450.0          |
| 1 month - 3 months                                      | 80.0 - 500.0           |
| 3 months - 18 years                                     | 20.0 - 200.0           |
| <b>SOLUBLE TRANSFERRIN RECEPTOR in mg/L:</b>            |                        |
| <b>Age</b>                                              | <b>Reference range</b> |
| 1 month - 18 years                                      | 0.76 - 1.76            |
| <b>SOLUBLE TRANSFERRIN RECEPTOR/ LOG FERRITIN RATIO</b> |                        |
| <b>Age</b>                                              | <b>Reference range</b> |
| 1 month - 18 years                                      | 0.38 - 1.54            |
| <b>TRANSFERRIN SATURATION in %</b>                      |                        |
| <b>Age</b>                                              | <b>Reference range</b> |
| 1 month – 5 years                                       | 7.0 - 44.0             |
| 5 years - 9 years                                       | 17.0 - 42.0            |
| <= 14 years                                             | 11.0 - 36.0            |
| <= 19 years                                             | 6.0 - 33.0             |
| > 19 years                                              | 16.0 - 45.0            |
